# Supplementary material for: Impacts of Telomeric Length, Chronic Hypoxia, Senescence, and Senescence-Associated Secretory Phenotype on the Development of Thoracic Aortic Aneurysm
Source: MDPI journal article supplement (doi:10.3390/ijms232415498), 2022-12-07
Supplement: s1 [file s1]

Supplementary Figures

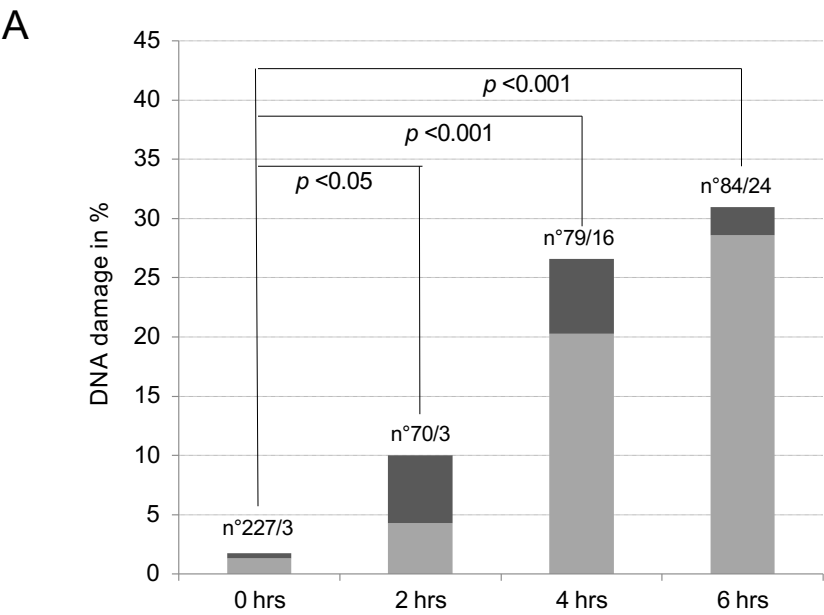

**B**

| time  | Media                    |                |
|-------|--------------------------|----------------|
|       | $\gamma$ H2AX positive % | TIF positive % |
| 0 hrs | 1.32                     | 0.44           |
| 2 hrs | 4.29                     | 5.71           |
| 4 hrs | 20.25                    | 6.33           |
| 6 hrs | 28.57                    | 2.38           |

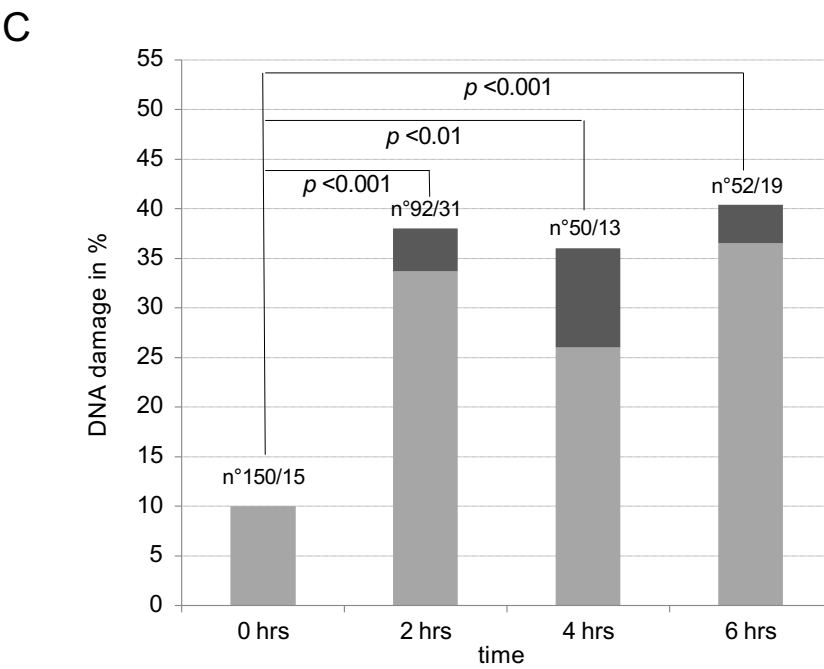

## Supplementary Figures

D

|       | Endothel/Intima          |                |
|-------|--------------------------|----------------|
| time  | $\gamma$ H2AX positive % | TIF positive % |
| 0 hrs | 10.00                    | 0.00           |
| 2 hrs | 33.70                    | 4.35           |
| 4 hrs | 26.00                    | 10.00          |
| 6 hrs | 36.54                    | 3.85           |

**Figure S1. Incorrect sample preparation leads to false-positive DNA damage signals.** We analysed DNA damage response signals on different time-points by  $\gamma$ H2AX and TIF immunohistostaining to avoid false-positive results. Tissue was immediately fixed during surgery, or after 2, 4, and 6 hours incubation in PBS. TIF signals (dark grey) were measured by co-localisation staining of TRF-1 and  $\gamma$ H2AX signals (grey). Illustrating the positive n° of  $\gamma$ H2AX in the n° of nuclei counted. Statistical analysis were separately calculated for (A+B) medial layer, and (C+D) endothelial/intima layer. Analysis was performed by two-tailed Student *t*-test. Tables show values in %. Assays were done on healthy aortic tissue specimen (n=5).

A

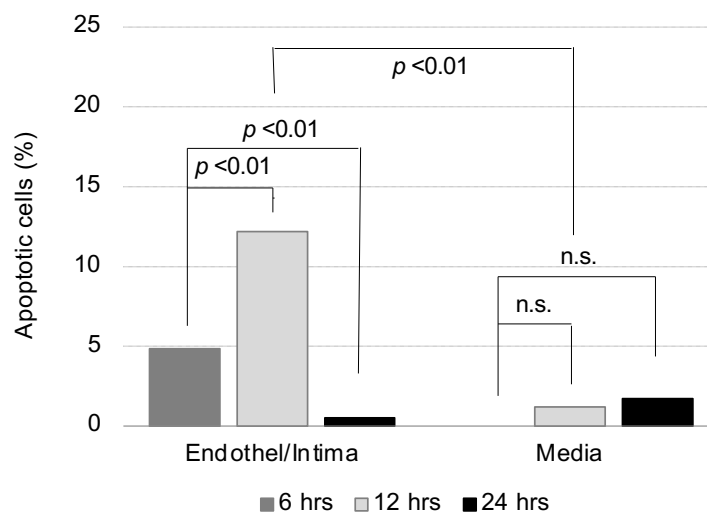

## Supplementary Figures

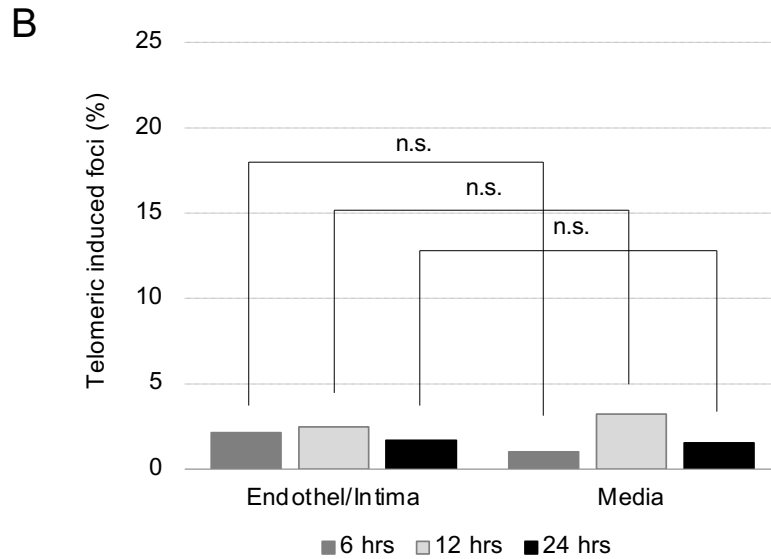

**Figure S2. Hypoxic ex-vivo conditions lead to an increase of apoptotic cells, but unaltered telomeric ends.** Human tissues were stored in cell culture medium for 6, 12, or 24 hours (hrs), or fixed immediately during surgery. (A) Apoptotic cells, as well as, (B) telomeric induced foci were analysed by immunofluorescence. Endothelial/intimal and medial layer are shown separately. Statistical significance are given (n=5, ANOVA). n.s., non-significant.
